# Supplementary material for: Quantitative Assessment of Periodontal Bacteria Using a Cell-Based Immunoassay with Functionalized Quartz Crystal Microbalance
Source: MDPI journal article supplement (doi:10.3390/chemosensors9070159), 2021-06-25
Supplement: s1 [file s1]

# Quantitative Assessment of Periodontal Bacteria Using a Cell-Based Immunoassay with Functionalized Quartz Crystal Microbalance

Satit Rodphukdeekul <sup>1,2</sup>, Miyuki Tabata <sup>2</sup>, Chindanai Ratanaporncharoen <sup>2</sup>, Yasuo Takeuchi <sup>3</sup>,  
Pakpum Somboon <sup>1</sup>, Watcharee Boonlue <sup>4,6</sup>, Yuji Miyahara <sup>2,\*</sup> and Mana Sriyudthsak <sup>5,\*</sup>

<sup>1</sup> Biomedical Engineering Program, Faculty of Engineering, Chulalongkorn University, Bangkok 10330, Thailand; satit.rod@student.chula.ac.th (S.R.); pakpum.s@chula.ac.th (P.S.)

<sup>2</sup> Institute of Biomaterials and Bioengineering, Tokyo Medical and Dental University, Tokyo 101-0062, Japan; tabata.bsr@tmd.ac.jp (M.T.); r.chindanai@gmail.com (C.R.)

<sup>3</sup> Department of Periodontology, Faculty of Dentistry, Tokyo Medical and Dental University, Tokyo 113-8510, Japan; takeuchi.peri@tmd.ac.jp

<sup>4</sup> Department of Nutrition and Dietetics, Faculty of Allied Health Sciences, Chulalongkorn University, Bangkok 10330, Thailand; Watcharee.Bo@chula.ac.th

<sup>5</sup> Department of Electrical Engineering, Faculty of Engineering, Chulalongkorn University, Bangkok 10330, Thailand

<sup>6</sup> Biosensors and Bioanalytical Technology for Cells and Innovative Testing Device Research Unit, Chulalongkorn University, Bangkok 10330, Thailand

\* Correspondence: miyahara.bsr@tmd.ac.jp (Y.M.); mana.S@chula.ac.th (M.S.)

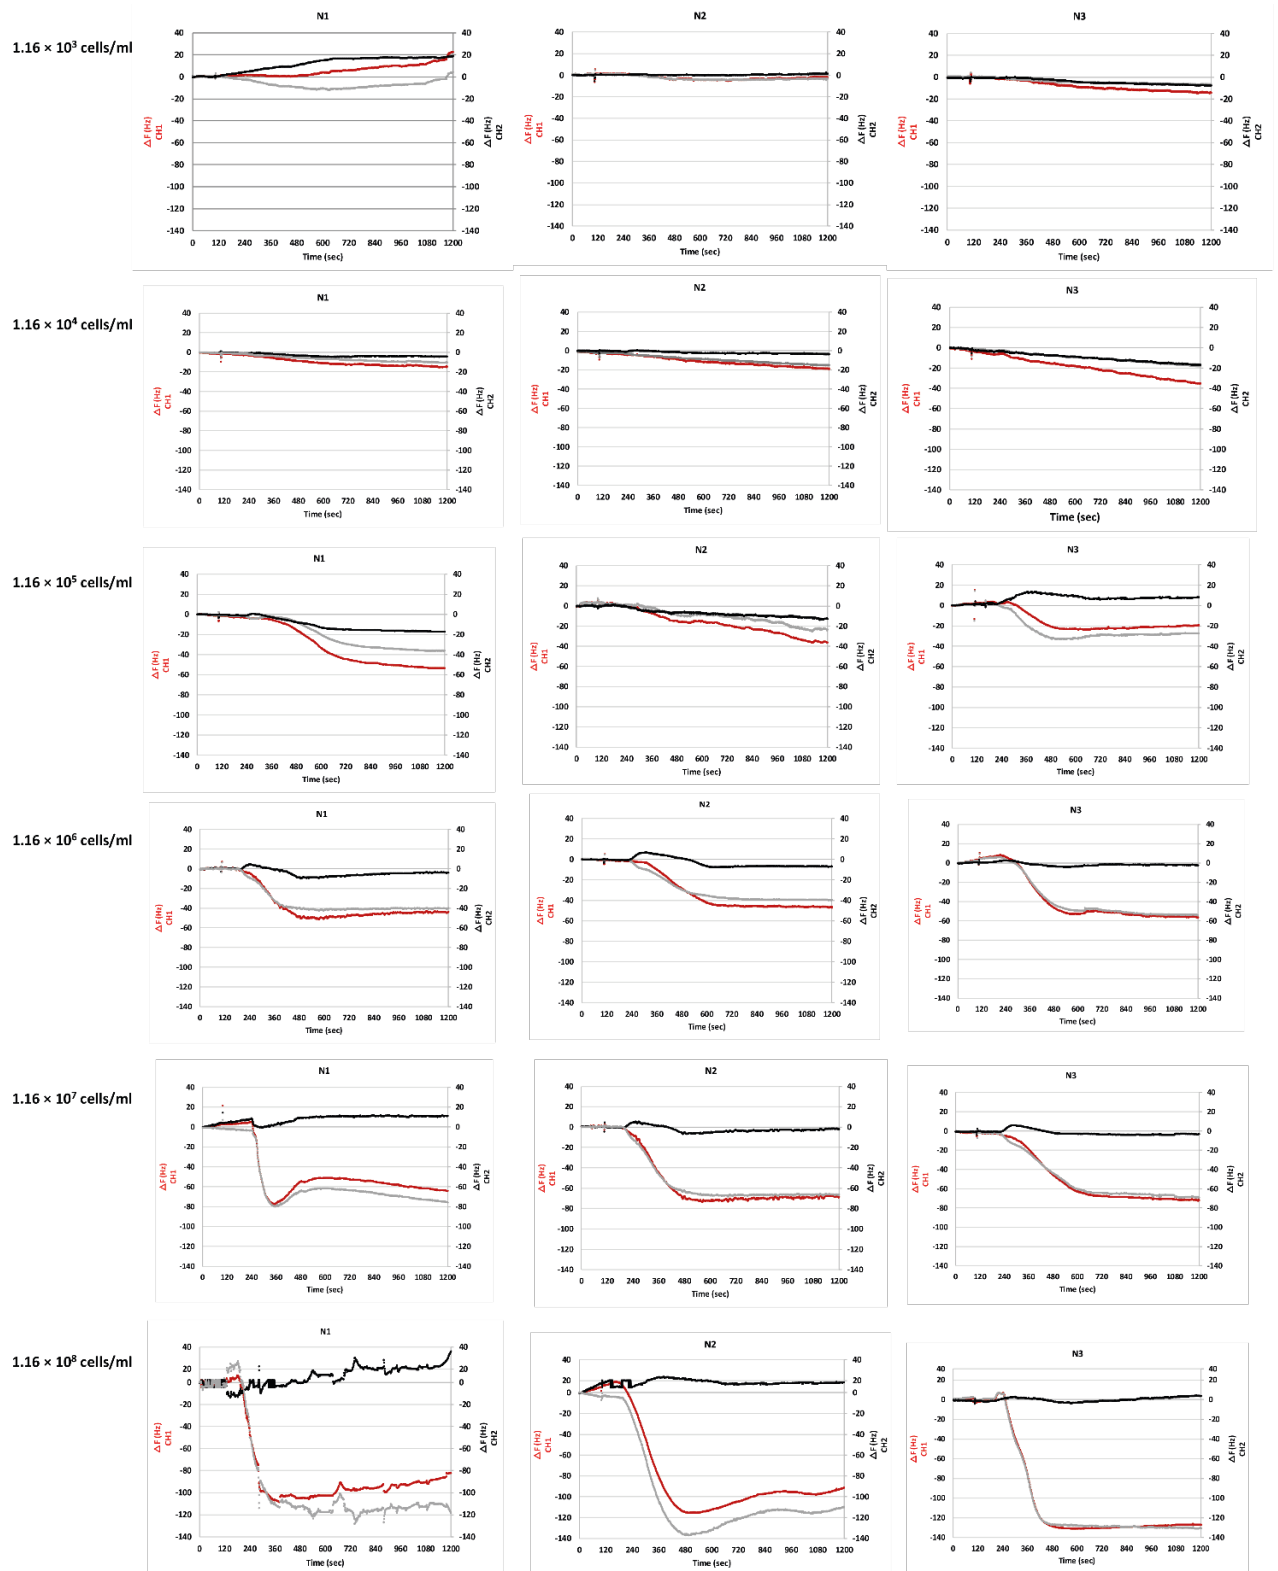

**Figure S1** Response profiles of *A. actinomycetemcomitans* antibody-immobilized sensors for *A. actinomycetemcomitans* cells detection (red). Non antibody-immobilized sensors (black) were used as negative control.

The response of the QCM sensors to various concentrations of bacteria were recorded and each measurement was repeated three times (N1-3).
